# Supplementary material for: Workplace gender-based violence and associated factors among university women in Enugu, South-East Nigeria: an institutional-based cross-sectional study
Source: BMC Womens Health. 2021 Mar 23;21:124. doi: 10.1186/s12905-021-01273-w (PMC7988966; doi:10.1186/s12905-021-01273-w)
Supplement: Supplementary file 1 — Additional file 1: Reliability test results for MWIS. [file 12905_2021_1273_MOESM1_ESM.xlsx]

## Sheet: Sheet1
RELIABILITY
/VARIABLES=mWIS8 mWIS9 mWIS10 mWIS11 mWIS12 mWIS13 mWIS14
/SCALE('Blau & Andersson modified WIS') ALL
/MODEL=ALPHA
/STATISTICS=DESCRIPTIVE SCALE CORR
/SUMMARY=TOTAL.
Reliability
Notes
Output Created		2019-06-13 17:42:55
Comments
Input	Data	C:\Users\hp user\Desktop\Agbaje & Arua\2019 Paper\GBV Manuscript\Stat folder\Reliability Data.sav
	Active Dataset	DataSet3
	Filter	<none>
	Weight	<none>
	Split File	<none>
	N of Rows in Working Data File	20
	Matrix Input
Missing Value Handling	Definition of Missing	User-defined missing values are treated as missing.
	Cases Used	Statistics are based on all cases with valid data for all variables in the procedure.
Syntax		RELIABILITY /VARIABLES=mWIS8 mWIS9 mWIS10 mWIS11 mWIS12 mWIS13 mWIS14 /SCALE('Blau & Andersson modified WIS') ALL /MODEL=ALPHA /STATISTICS=DESCRIPTIVE SCALE CORR /SUMMARY=TOTAL.
Resources	Processor Time	00:00:00.02
	Elapsed Time	00:00:00.03
Scale: Blau & Andersson modified WIS
Case Processing Summary
		N	%
Cases	Valid	20	100
	Excludeda	0	0
	Total	20	100
a. Listwise deletion based on all variables in the procedure.
Reliability Statistics
Cronbach's Alpha	Cronbach's Alpha Based on Standardized Items	N of Items
0.810238	0.803799	7
Item Statistics
	Mean	Std. Deviation	N
mWIS8	1.7	1.12858	20
mWIS9	2.15	1.22582	20
mWIS10	1.45	0.825578	20
mWIS11	1.35	0.812728	20
mWIS12	1.95	0.998683	20
mWIS13	1.5	0.82717	20
mWIS14	1.55	0.759155	20
Inter-Item Correlation Matrix
	mWIS8	mWIS9	mWIS10	mWIS11	mWIS12	mWIS13	mWIS14
mWIS8	1	0.719037	0.321983	0.636933	0.312869	0.451035	0.325583
mWIS9	0.719037	1	0.345847	0.578481	0.436374	0.700743	0.415697
mWIS10	0.321983	0.345847	1	-0.0117662	-0.16278	0.346821	0.508058
mWIS11	0.636933	0.578481	-0.0117662	1	0.282074	0.274015	0.268709
mWIS12	0.312869	0.436374	-0.16278	0.282074	1	0.477843	0.315864
mWIS13	0.451035	0.700743	0.346821	0.274015	0.477843	1	0.209537
mWIS14	0.325583	0.415697	0.508058	0.268709	0.315864	0.209537	1
Item-Total Statistics
	Scale Mean if Item Deleted	Scale Variance if Item Deleted	Corrected Item-Total Correlation	Squared Multiple Correlation	Cronbach's Alpha if Item Deleted
mWIS8	9.95	13.7342	0.700921	0.634708	0.754167
mWIS9	9.5	12.2632	0.827604	0.743812	0.72309
mWIS10	10.2	18.0632	0.303	0.646564	0.821678
mWIS11	10.3	16.7474	0.520624	0.544064	0.790446
mWIS12	9.7	16.6421	0.3966	0.565775	0.812144
mWIS13	10.15	16.0289	0.627764	0.650146	0.773863
mWIS14	10.1	17.2526	0.482377	0.550251	0.796583
Scale Statistics
Mean	Variance	Std. Deviation	N of Items
11.65	20.8711	4.56848	7
